# Supplementary material for: 1,10-Phenanthroline-based periodic mesoporous organosilica: from its synthesis to its application in the cobalt-catalyzed alkyne hydrosilylation
Source: Royal Society of Chemistry journal article supplement (doi:10.1039/d2ra08272a), 2023-01-01
Supplement: d2ra08272a1.pdf [file d2ra08272a1.pdf]

## Supporting Information

# 1,10-Phenanthroline-based periodic mesoporous organosilica: from its synthesis to its application in the cobalt-catalyzed alkyne hydrosilylation

Xiao-Tao Lin,<sup>ab</sup> Yusuke Ishizaka,<sup>a</sup> Yoshifumi Maegawa,<sup>c</sup> Katsuhiko Takeuchi,<sup>a</sup> Shinji Inagaki,<sup>\*ac</sup> Kazuhiro Matsumoto,<sup>\*a</sup> and Jun-Chul Choi<sup>\*ab</sup>

<sup>a</sup> National Institute of Advanced Industrial Science and Technology (AIST), Tsukuba Central 5, 1-1-1 Higashi, Tsukuba, Ibaraki 305-8565, Japan.

E-mail: kazuhiro.matsumoto@aist.go.jp; junchul.choi@aist.go.jp.

<sup>b</sup> Graduate School of Pure and Applied Sciences, University of Tsukuba, 1-1-1 Tennodai, Tsukuba, Ibaraki 305-8573, Japan.

<sup>c</sup> Toyota Central R&D Labs., Inc., Nagakute, Aichi 480-1192, Japan.

## CONTENTS

|                                                                                                      |    |
|------------------------------------------------------------------------------------------------------|----|
| <sup>29</sup> Si DD/MAS NMR spectrum of Phen-PMO prepared with C <sub>22</sub> TMACl (Fig. S1) ..... | S2 |
| <sup>29</sup> Si DD/MAS NMR spectrum of Phen-PMO prepared with Brij76 (Fig. S2) .....                | S2 |
| N <sub>2</sub> adsorption/desorption isotherm of Phen-PMO prepared with Brij76 (Fig. S3) .....       | S3 |
| TEM images of Phen-PMO prepared with Brij76 (Fig. S4).....                                           | S3 |
| <sup>13</sup> C CP/MAS NMR spectrum of Phen-PMO <b>3</b> (Fig. S5) .....                             | S4 |
| <sup>29</sup> Si CP/MAS NMR spectrum of Phen-PMO <b>3</b> (Fig. S6) .....                            | S4 |
| Solution-state NMR Spectra of <b>1a</b> (Fig. S7-9) .....                                            | S5 |
| Optimization of hydrosilylation conditions (Table S1) .....                                          | S6 |

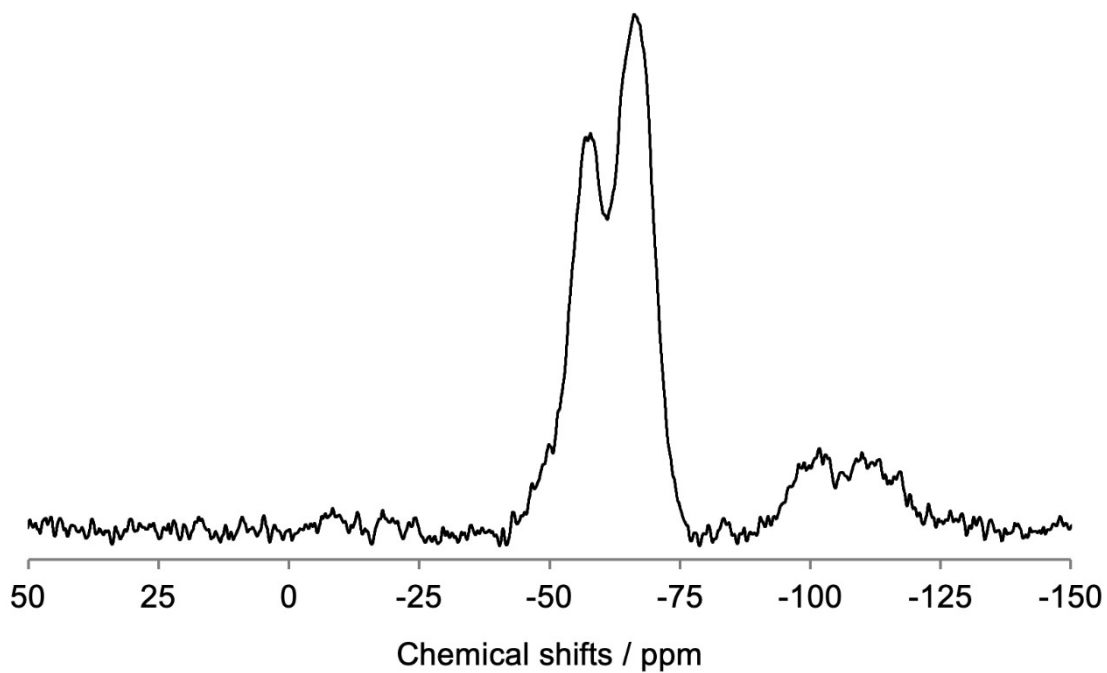

**Fig. S1**  $^{29}\text{Si}$  DD/MAS NMR spectrum of Phen-PMO prepared with  $\text{C}_{22}\text{TMACl}$ .

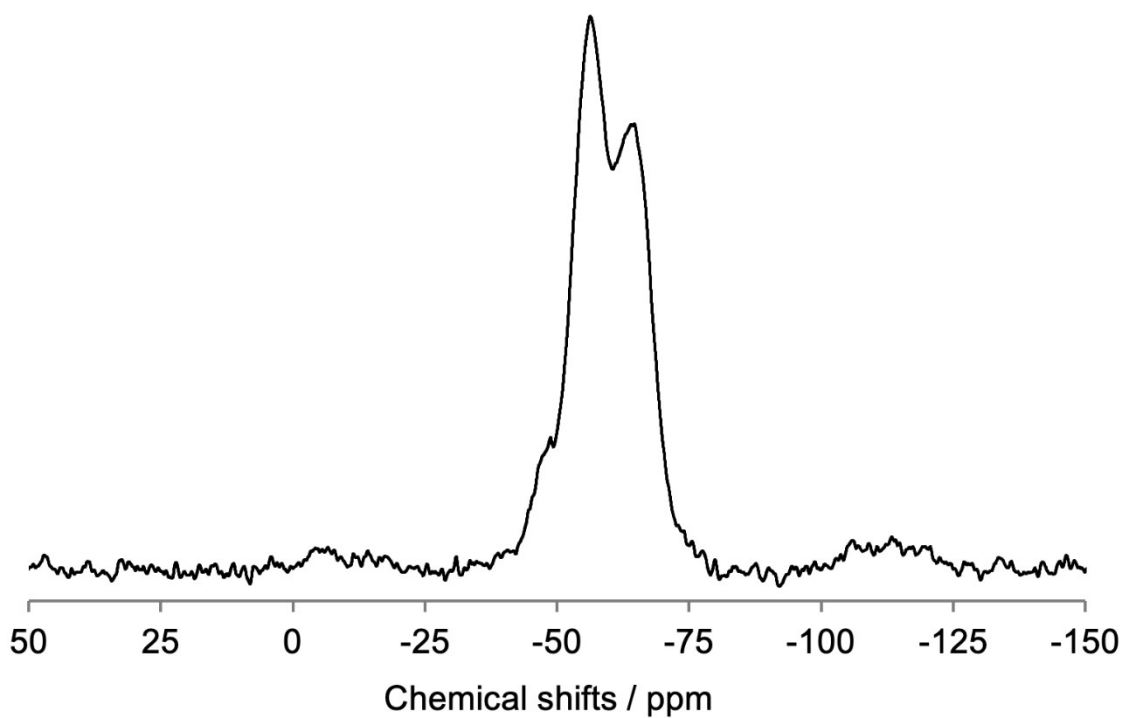

**Fig. S2**  $^{29}\text{Si}$  DD/MAS NMR spectrum of Phen-PMO prepared with Brij76.

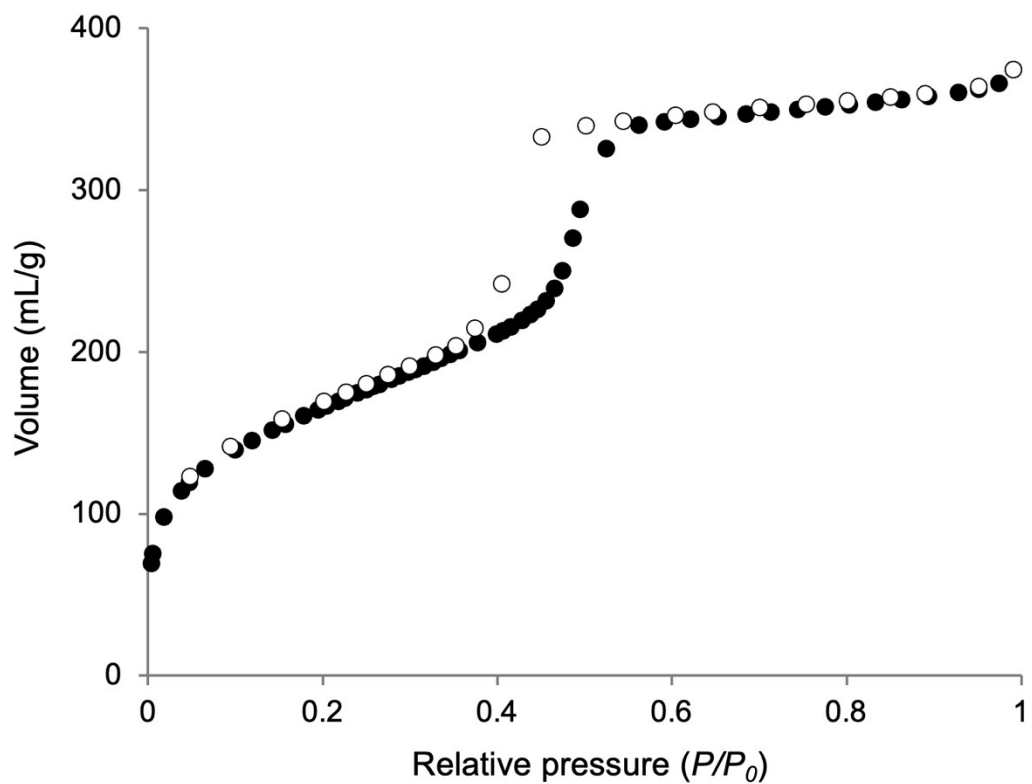

**Fig. S3** N<sub>2</sub> adsorption/desorption isotherm of Phen-PMO prepared with Brij76.

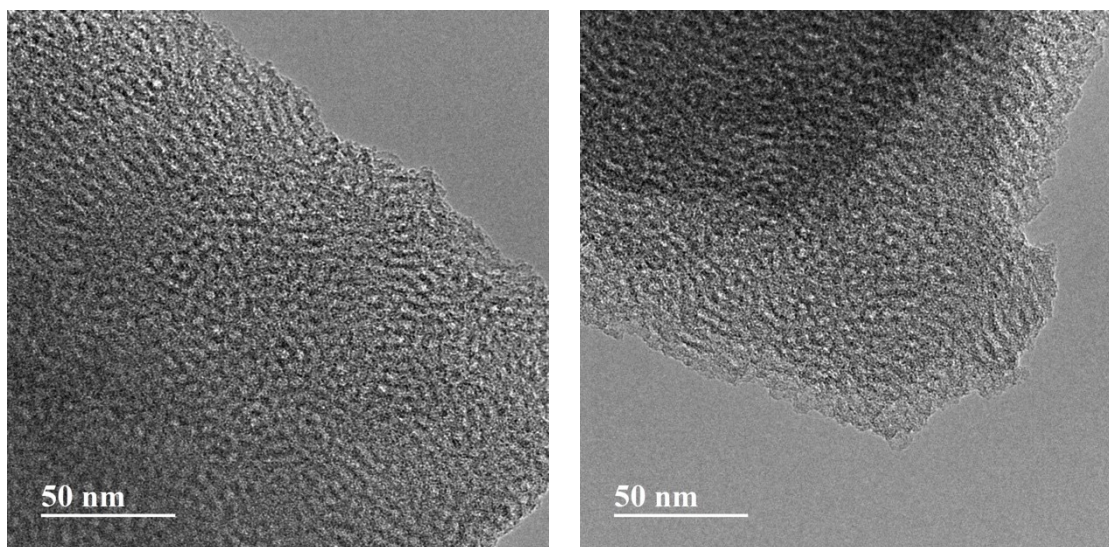

**Fig. S4** TEM images of Phen-PMO prepared with Brij76.

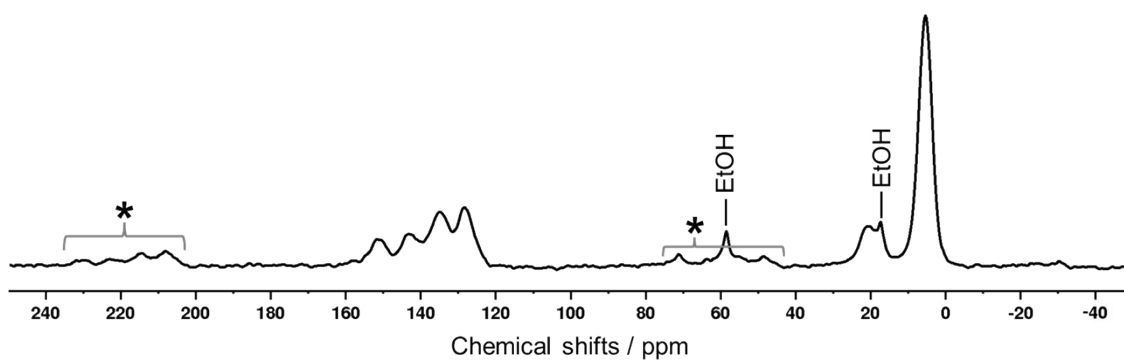

**Fig. S5**  $^{13}\text{C}$  CP/MAS NMR spectrum of Phen-PMO **3**. The asterisk (\*) denotes spinning side bands.

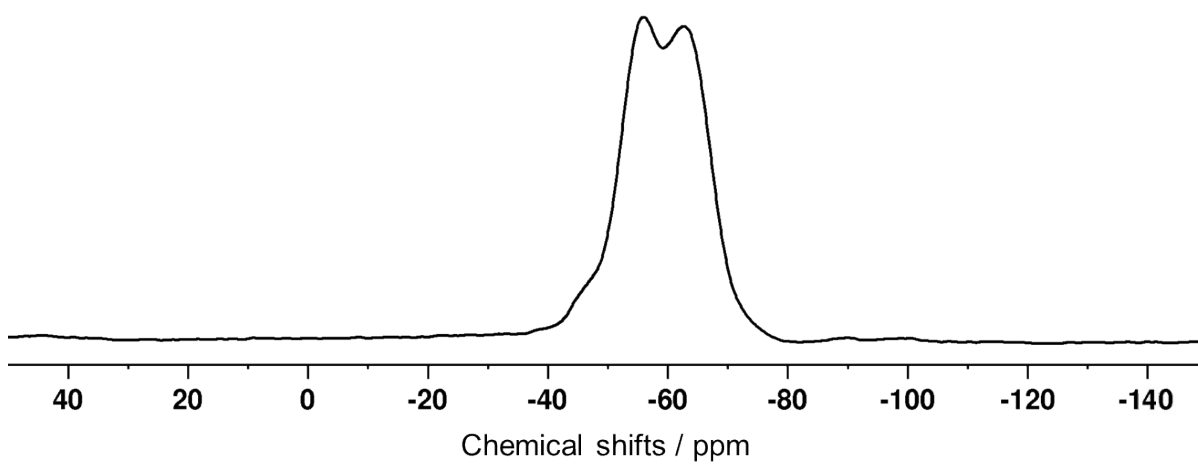

**Fig. S6**  $^{29}\text{Si}$  CP/MAS NMR spectrum of Phen-PMO **3**.

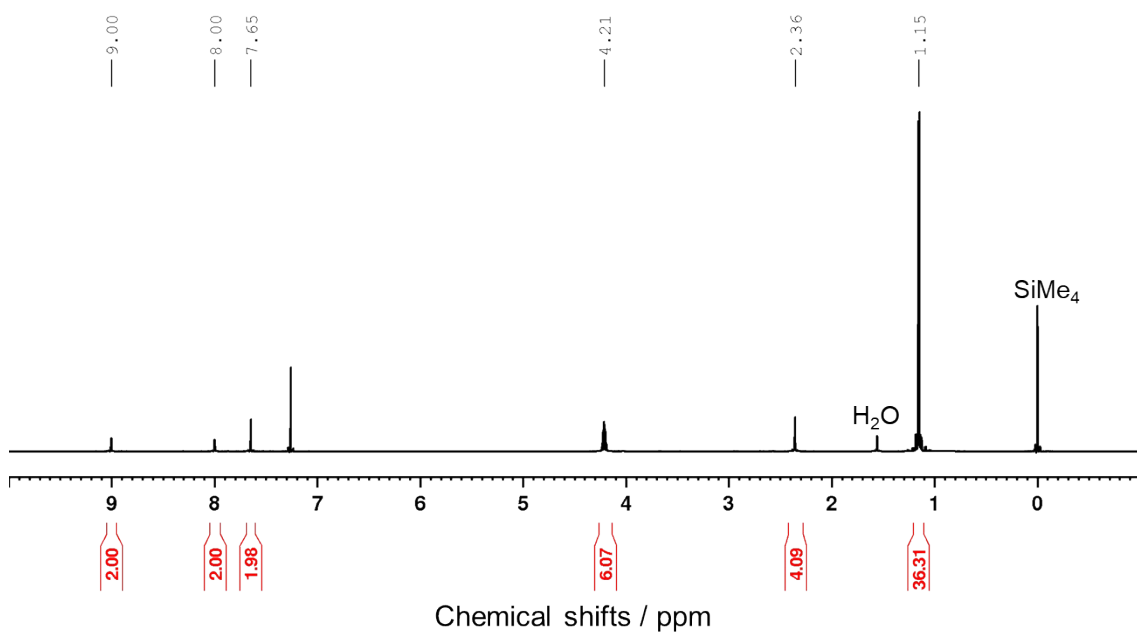

**Fig. S7**  $^1\text{H}$  NMR spectrum of **1a**.

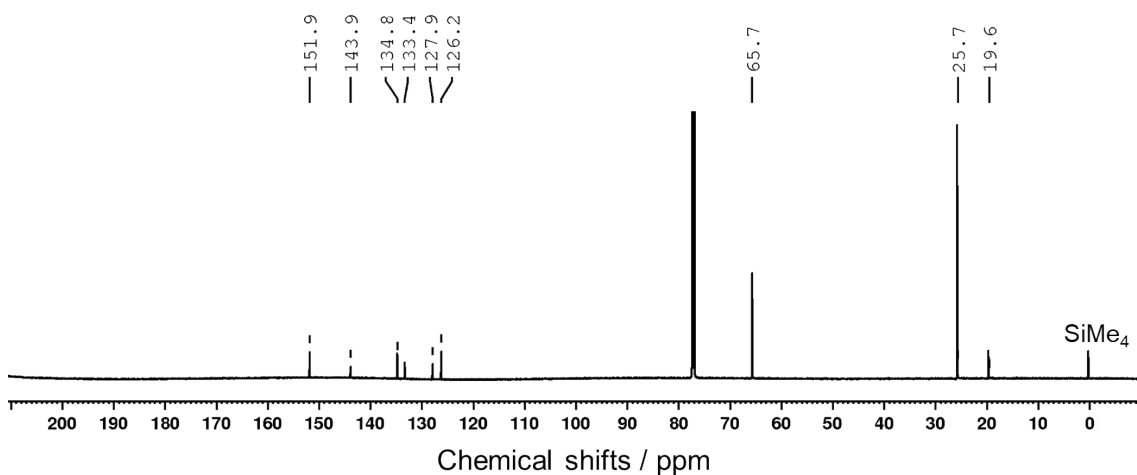

**Fig. S8**  $^{13}\text{C}\{^1\text{H}\}$  NMR spectrum of **1a**.

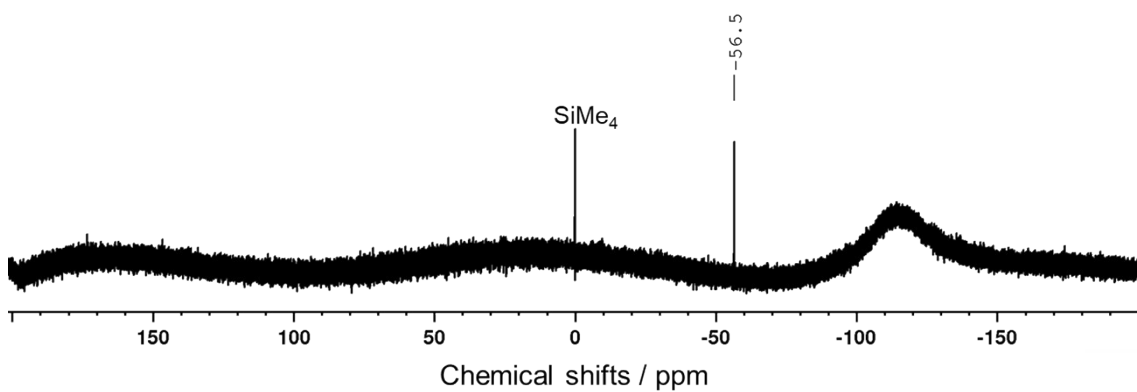

**Fig. S9**  $^{29}\text{Si}\{^1\text{H}\}$  NMR spectrum of **1a**.

**Table S1** Optimization of hydrosilylation conditions.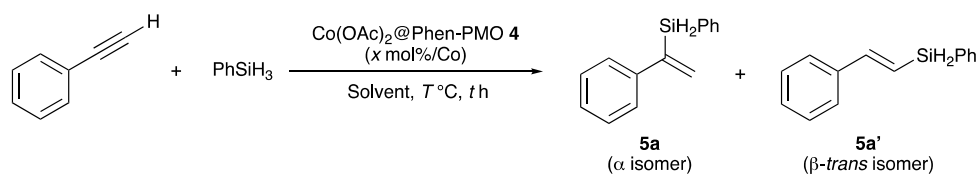

| Entry          | Solvent | $T$ ( $^{\circ}\text{C}$ ) | $t$ (h) | $x$ (mol%/Co) | Yield (%)       | <b>5a:5a'</b> |
|----------------|---------|----------------------------|---------|---------------|-----------------|---------------|
| 1              | THF     | 60                         | 2       | 0.5           | 37              | 5:1           |
| 2              | THF     | 60                         | 6       | 0.5           | 54              | 3:1           |
| 3              | THF     | 100                        | 2       | 0.5           | 65              | 3:1           |
| 4              | THF     | 100                        | 2       | 2             | 67              | 4:1           |
| 5              | Toluene | 100                        | 2       | 0.5           | 53              | 3:1           |
| 6 <sup>a</sup> | THF     | 100                        | 2       | —             | ND <sup>b</sup> | —             |

<sup>a</sup>Phen-PMO **3** was used instead of  $\text{Co(OAc)}_2@$ Phen-PMO **4**. <sup>b</sup>Not detected.
